# Supplementary material
Source: MDPI journal article supplement (https://www.mdpi.com/2311-7524/9/7/803)
Supplement: s1 [file s1]

Table S1. Summary of relevant parameters and samples for the eight *Vitaceae* seed main types recognized in the study of Tell Khâmis and QuaraQuzaq.

| Code of Samples                                               | ANT  | CAS  | PON  | OCC  | HYB  | SYL  | FER  | HYBCAU | FERCAU | CAU  | AME  | ASI  | FOS  | Hybrid<br>pop<br>index | Domestication<br>index | L<br>(mm) | M<br>(mm) | Cluster<br>2022 | Breadth/Length<br>(Stummer) >75 | Beak length /<br>Seed Length<br>(Perret) <19 | Mangafa<br>and<br>Kotsakis's<br>F1 -0.2 | Mangafa and<br>Kotsakis's F2 -<br>0.2 | Mangafa and<br>Kotsakis's F3<br>0 | Mangafa and<br>Kotsakis's F4 -<br>0.9 | Wild<br>index | STATUS<br>EXP |
|---------------------------------------------------------------|------|------|------|------|------|------|------|--------|--------|------|------|------|------|------------------------|------------------------|-----------|-----------|-----------------|---------------------------------|----------------------------------------------|-----------------------------------------|---------------------------------------|-----------------------------------|---------------------------------------|---------------|---------------|
| 3.1.1 Domesticated grapevines of the Proles Orientalis Negrul |      |      |      |      |      |      |      |        |        |      |      |      |      |                        |                        |           |           |                 |                                 |                                              |                                         |                                       |                                   |                                       |               |               |
| 264_tell_jamis_as_95_6                                        | 0.87 | 0.00 | 0.00 | 0.12 | 0.00 | 0.00 | 0.00 | 0.00   | 0.00   | 0.00 | 0.00 | 0.02 | 0.00 |                        | 1.00                   | 410.50    | 266.50    | 13              | 64.85                           | 29.75                                        | -0.36                                   | 3.24                                  | 0.57                              | -0.83                                 | 16.67         | 0.00          |
| 264_tell_jamis_as_95_6                                        | 0.38 | 0.00 | 0.00 | 0.21 | 0.00 | 0.00 | 0.00 | 0.00   | 0.00   | 0.00 | 0.00 | 0.40 | 0.00 | 0.24                   | 0.83                   | 410.50    | 266.50    | 13              | 64.85                           | 29.75                                        | -0.36                                   | 3.24                                  | 0.57                              | -0.83                                 | 16.67         | 0.00          |
| 332_Iran_Marjan_Mashkour                                      | 0.87 | 0.00 | 0.00 | 0.12 | 0.00 | 0.00 | 0.00 | 0.00   | 0.00   | 0.00 | 0.00 | 0.02 | 0.00 |                        | 1.00                   | 426.00    | 235.80    | 13              | 55.04                           | 20.45                                        | -0.94                                   | 1.36                                  | -0.51                             | -0.90                                 | 33.33         | 0.00          |
| 724Afghan_Market_Paris_dorada                                 | 0.87 | 0.00 | 0.00 | 0.12 | 0.00 | 0.00 | 0.00 | 0.00   | 0.00   | 0.00 | 0.00 | 0.02 | 0.00 | 0.00                   | 1.00                   | 480.00    | 237.30    | 13              | 49.55                           | 38.56                                        | 2.79                                    | 7.03                                  | 3.37                              | 1.92                                  | 0.00          | 0.00          |
| 725Afghan_Market_Paris_verde                                  | 0.87 | 0.00 | 0.00 | 0.12 | 0.00 | 0.00 | 0.00 | 0.00   | 0.00   | 0.00 | 0.00 | 0.02 | 0.00 | 0.00                   | 1.00                   | 508.40    | 279.20    | 13              | 55.03                           | 34.90                                        | 2.92                                    | 6.86                                  | 3.41                              | 2.65                                  | 0.00          | 0.00          |
| 150Uzbekistan                                                 | 0.55 | 0.15 | 0.16 | 0.10 | 0.00 | 0.00 | 0.01 | 0.00   | 0.02   | 0.00 | 0.00 | 0.00 | 0.00 | 0.00                   | 1.00                   | 721.80    | 415.00    | 5               | 57.53                           | 30.08                                        | 4.29                                    | 4.87                                  | 2.46                              | 2.05                                  | 0.00          | 0.00          |
| 269_chaouch blanc (11)                                        | 0.55 | 0.15 | 0.16 | 0.10 | 0.00 | 0.00 | 0.01 | 0.00   | 0.02   | 0.00 | 0.00 | 0.00 | 0.00 | 0.00                   | 1.00                   | 639.60    | 379.60    | 5               | 59.49                           | 29.00                                        | 3.36                                    | 6.23                                  | 3.18                              | 3.66                                  | 0.00          | 0.00          |
| 275_chaouch rose (3)                                          | 0.55 | 0.15 | 0.16 | 0.10 | 0.00 | 0.00 | 0.01 | 0.00   | 0.02   | 0.00 | 0.00 | 0.00 | 0.00 | 0.00                   | 1.00                   | 694.47    | 423.60    | 5               | 60.86                           | 27.11                                        | 3.49                                    | 6.24                                  | 3.40                              | 4.28                                  | 0.00          | 0.00          |
| 278_shiradzouli violet (20)                                   | 0.55 | 0.15 | 0.16 | 0.10 | 0.00 | 0.00 | 0.01 | 0.00   | 0.02   | 0.00 | 0.00 | 0.00 | 0.00 | 0.00                   | 1.00                   | 651.00    | 349.73    | 5               | 53.76                           | 33.27                                        | 5.00                                    | 7.54                                  | 3.97                              | 4.28                                  | 0.00          | 0.00          |
| 282_beylerce (2)                                              | 0.55 | 0.15 | 0.16 | 0.10 | 0.00 | 0.00 | 0.01 | 0.00   | 0.02   | 0.00 | 0.00 | 0.00 | 0.00 |                        | 1.00                   | 543.40    | 348.73    | 5               | 64.26                           | 29.95                                        | 2.58                                    | 6.41                                  | 3.25                              | 3.35                                  | 0.00          | 0.00          |
| 282_beylerce (2)                                              | 0.55 | 0.15 | 0.16 | 0.10 | 0.00 | 0.00 | 0.01 | 0.00   | 0.02   | 0.00 | 0.00 | 0.00 | 0.00 | 0.04                   | 0.99                   | 543.40    | 348.73    | 5               | 64.26                           | 29.95                                        | 2.58                                    | 6.41                                  | 3.25                              | 3.35                                  | 0.00          | 0.00          |
| 283_konya bozkir (14)                                         | 0.55 | 0.15 | 0.16 | 0.10 | 0.00 | 0.00 | 0.01 | 0.00   | 0.02   | 0.00 | 0.00 | 0.00 | 0.00 |                        | 1.00                   | 556.60    | 357.07    | 5               | 64.16                           | 24.58                                        | 1.20                                    | 4.67                                  | 2.14                              | 2.55                                  | 0.00          | 0.00          |
| 283_konya bozkir (14)                                         | 0.55 | 0.15 | 0.16 | 0.10 | 0.00 | 0.00 | 0.01 | 0.00   | 0.02   | 0.00 | 0.00 | 0.00 | 0.00 | 0.04                   | 0.99                   | 556.60    | 357.07    | 5               | 64.16                           | 24.58                                        | 1.20                                    | 4.67                                  | 2.14                              | 2.55                                  | 0.00          | 0.00          |
| 284_rasheh (22)                                               | 0.55 | 0.15 | 0.16 | 0.10 | 0.00 | 0.00 | 0.01 | 0.00   | 0.02   | 0.00 | 0.00 | 0.00 | 0.00 |                        | 1.00                   | 590.60    | 397.87    | 5               | 67.79                           | 26.05                                        | 2.20                                    | 5.81                                  | 2.96                              | 3.68                                  | 0.00          | 0.00          |
| 284_rasheh (22)                                               | 0.55 | 0.15 | 0.16 | 0.10 | 0.00 | 0.00 | 0.01 | 0.00   | 0.02   | 0.00 | 0.00 | 0.00 | 0.00 | 0.06                   | 0.98                   | 590.60    | 397.87    | 5               | 67.79                           | 26.05                                        | 2.20                                    | 5.81                                  | 2.96                              | 3.68                                  | 0.00          | 0.00          |
| 287_besni (1)                                                 | 0.55 | 0.15 | 0.16 | 0.10 | 0.00 | 0.00 | 0.01 | 0.00   | 0.02   | 0.00 | 0.00 | 0.00 | 0.00 | 0.00                   | 1.00                   | 652.87    | 441.47    | 5               | 67.68                           | 30.56                                        | 4.57                                    | 8.15                                  | 4.52                              | 5.63                                  | 0.00          | 0.00          |
| 288_hasandede beyazi (5)                                      | 0.55 | 0.15 | 0.16 | 0.10 | 0.00 | 0.00 | 0.01 | 0.00   | 0.02   | 0.00 | 0.00 | 0.00 | 0.00 |                        | 1.00                   | 551.00    | 325.20    | 5               | 59.28                           | 29.60                                        | 2.41                                    | 5.98                                  | 2.90                              | 2.94                                  | 0.00          | 0.00          |
| 288_hasandede beyazi (5)                                      | 0.55 | 0.15 | 0.16 | 0.10 | 0.00 | 0.00 | 0.01 | 0.00   | 0.02   | 0.00 | 0.00 | 0.00 | 0.00 | 0.04                   | 0.99                   | 551.00    | 325.20    | 5               | 59.28                           | 29.60                                        | 2.41                                    | 5.98                                  | 2.90                              | 2.94                                  | 0.00          | 0.00          |
| 289_rumi ahmar (6)                                            | 0.55 | 0.15 | 0.16 | 0.10 | 0.00 | 0.00 | 0.01 | 0.00   | 0.02   | 0.00 | 0.00 | 0.00 | 0.00 | 0.00                   | 1.00                   | 638.53    | 405.80    | 5               | 63.63                           | 23.94                                        | 1.70                                    | 4.89                                  | 2.43                              | 3.22                                  | 0.00          | 0.00          |
| 290_razakisi antep (13)                                       | 0.55 | 0.15 | 0.16 | 0.10 | 0.00 | 0.00 | 0.01 | 0.00   | 0.02   | 0.00 | 0.00 | 0.00 | 0.00 | 0.00                   | 1.00                   | 692.80    | 399.07    | 5               | 57.65                           | 34.51                                        | 6.74                                    | 9.67                                  | 5.47                              | 6.67                                  | 0.00          | 0.00          |
| 291_haci tespihi (4)                                          | 0.55 | 0.15 | 0.16 | 0.10 | 0.00 | 0.00 | 0.01 | 0.00   | 0.02   | 0.00 | 0.00 | 0.00 | 0.00 | 0.00                   | 1.00                   | 595.67    | 358.00    | 5               | 60.17                           | 30.20                                        | 3.43                                    | 7.07                                  | 3.71                              | 4.24                                  | 0.00          | 0.00          |
| 292_zonguldak (9)                                             | 0.55 | 0.15 | 0.16 | 0.10 | 0.00 | 0.00 | 0.01 | 0.00   | 0.02   | 0.00 | 0.00 | 0.00 | 0.00 | 0.00                   | 1.00                   | 699.20    | 392.67    | 5               | 56.24                           | 25.49                                        | 3.31                                    | 7.02                                  | 3.99                              | 5.59                                  | 0.00          | 0.00          |
| 293_dabouki (18)                                              | 0.55 | 0.15 | 0.16 | 0.10 | 0.00 | 0.00 | 0.01 | 0.00   | 0.02   | 0.00 | 0.00 | 0.00 | 0.00 | 0.00                   | 1.00                   | 644.13    | 376.20    | 5               | 58.55                           | 28.79                                        | 3.94                                    | 7.78                                  | 4.31                              | 5.57                                  | 0.00          | 0.00          |
| 296_mecka (15)                                                | 0.55 | 0.15 | 0.16 | 0.10 | 0.00 | 0.00 | 0.01 | 0.00   | 0.02   | 0.00 | 0.00 | 0.00 | 0.00 | 0.00                   | 1.00                   | 659.73    | 385.73    | 5               | 58.53                           | 25.00                                        | 2.57                                    | 6.21                                  | 3.38                              | 4.62                                  | 0.00          | 0.00          |
| 297_nehelescol (19)                                           | 0.55 | 0.15 | 0.16 | 0.10 | 0.00 | 0.00 | 0.01 | 0.00   | 0.02   | 0.00 | 0.00 | 0.00 | 0.00 | 0.00                   | 1.00                   | 634.13    | 376.00    | 5               | 59.35                           | 27.80                                        | 3.43                                    | 7.39                                  | 4.08                              | 5.30                                  | 0.00          | 0.00          |
| 298_chasselas (Diego Jr.)                                     | 0.55 | 0.15 | 0.16 | 0.10 | 0.00 | 0.00 | 0.01 | 0.00   | 0.02   | 0.00 | 0.00 | 0.00 | 0.00 |                        | 1.00                   | 641.73    | 405.53    | 5               | 63.33                           | 28.67                                        | 3.88                                    | 7.66                                  | 4.23                              | 5.45                                  | 0.00          | 0.00          |
| 298_chasselas (Diego Jr.)                                     | 0.55 | 0.15 | 0.16 | 0.10 | 0.00 | 0.00 | 0.01 | 0.00   | 0.02   | 0.00 | 0.00 | 0.00 | 0.00 | 0.04                   | 0.99                   | 641.73    | 405.53    | 5               | 63.33                           | 28.67                                        | 3.88                                    | 7.66                                  | 4.23                              | 5.45                                  | 0.00          | 0.00          |
| 299_chasselas (Diego Jr.) U.                                  | 0.55 | 0.15 | 0.16 | 0.10 | 0.00 | 0.00 | 0.01 | 0.00   | 0.02   | 0.00 | 0.00 | 0.00 | 0.00 | 0.00                   | 1.00                   | 638.40    | 400.20    | 5               | 62.80                           | 28.56                                        | 3.81                                    | 7.87                                  | 4.40                              | 5.71                                  | 0.00          | 0.00          |
| 315_chasselas_Diego_Jr_U_2                                    | 0.55 | 0.15 | 0.16 | 0.10 |      |      |      |        |        |      |      |      |      |                        |                        |           |           |                 |                                 |                                              |                                         |                                       |                                   |                                       |               |               |

|                                                                   |      |      |      |      |      |      |      |      |      |      |      |      |      |      |      |        |        |    |       |       |       |       |       |       |       |      |
|-------------------------------------------------------------------|------|------|------|------|------|------|------|------|------|------|------|------|------|------|------|--------|--------|----|-------|-------|-------|-------|-------|-------|-------|------|
| 370_Levant_Andrea_Orendi                                          | 0.00 | 0.01 | 0.00 | 0.00 | 0.21 | 0.00 | 0.10 | 0.00 | 0.00 | 0.26 | 0.00 | 0.42 | 0.00 | 0.24 | 0.83 | 430.50 | 260.50 | 8  | 59.39 | 29.64 | -0.37 | 3.34  | 0.61  | -0.62 | 16.67 | 0.00 |
| 263_tell_jamis_as_95_6                                            | 0.00 | 0.01 | 0.00 | 0.00 | 0.21 | 0.00 | 0.10 | 0.00 | 0.00 | 0.26 | 0.00 | 0.42 | 0.00 | N/A  | 0.83 | 470.00 | 353.00 | 8  | 75.11 | 23.62 | 0.02  | 3.24  | 1.05  | 0.78  | 16.67 | 0.00 |
| 266_tell_jamis_as_108_1                                           | 0.00 | 0.01 | 0.00 | 0.00 | 0.21 | 0.00 | 0.10 | 0.00 | 0.00 | 0.26 | 0.00 | 0.42 | 0.00 | N/A  | 0.83 | 495.00 | 404.00 | 8  | 81.62 | 25.35 | 0.18  | 3.19  | 0.79  | 0.39  | 16.67 | 0.00 |
| 580ARQuara_QuzaqMBA_W78b                                          | 0.00 | 0.01 | 0.00 | 0.00 | 0.21 | 0.00 | 0.10 | 0.00 | 0.00 | 0.26 | 0.00 | 0.42 | 0.00 |      | 0.83 | 550.00 | 406.67 | 8  | 73.94 | 20.18 | -0.64 | 1.93  | 0.13  | 0.25  | 16.67 | 0.00 |
| 370_Levant_Andrea_Orendi                                          | 0.00 | 0.10 | 0.00 | 0.00 | 0.23 | 0.01 | 0.22 | 0.00 | 0.00 | 0.17 | 0.00 | 0.26 | 0.00 |      | 1.00 | 430.50 | 260.50 | 8  | 59.39 | 29.64 | -0.37 | 3.34  | 0.61  | -0.62 | 16.67 | 0.00 |
| 3.1.3. Domesticated grapevines related with Asian wild grapevines |      |      |      |      |      |      |      |      |      |      |      |      |      |      |      |        |        |    |       |       |       |       |       |       |       |      |
| 262_tell_jamis_as_85_5                                            | 0.00 | 0.00 | 0.00 | 0.00 | 0.29 | 0.04 | 0.00 | 0.00 | 0.00 | 0.00 | 0.00 | 0.67 | 0.00 | N/A  | 1.00 | 489.00 | 300.00 | 7  | 61.35 | 24.34 | -0.08 | 2.87  | 0.58  | 0.23  | 0.00  | 0.00 |
| 264_tell_jamis_as_95_6                                            | 0.06 | 0.00 | 0.00 | 0.16 | 0.00 | 0.03 | 0.00 | 0.00 | 0.00 | 0.00 | 0.00 | 0.74 | 0.00 |      | 0.67 | 410.50 | 266.50 | 13 | 64.85 | 29.75 | -0.36 | 3.24  | 0.57  | -0.83 | 16.67 | 0.00 |
| 648Robert_Spengler_Silk_Road_Tashbulak                            | 0.00 | 0.00 | 0.00 | 0.00 | 0.00 | 0.00 | 0.00 | 0.00 | 0.00 | 0.00 | 0.00 | 1.00 | 0.00 | N/A  | 0.67 | 470.00 | 287.00 | 12 | 61.06 | 19.04 | -1.07 | 1.61  | -0.16 | -0.13 | 33.33 | 0.00 |
| 332_Iran_Marjan_Mashkour                                          | 0.00 | 0.00 | 0.00 | 0.06 | 0.00 | 0.22 | 0.00 | 0.00 | 0.00 | 0.00 | 0.00 | 0.73 | 0.00 | 0.42 | 0.57 | 426.00 | 235.80 | 13 | 55.04 | 20.45 | -0.94 | 1.36  | -0.51 | -0.90 | 33.33 | 0.00 |
| 332_Iran_Marjan_Mashkour                                          | 0.00 | 0.00 | 0.00 | 0.06 | 0.00 | 0.22 | 0.00 | 0.00 | 0.00 | 0.00 | 0.00 | 0.73 | 0.00 |      | 0.50 | 426.00 | 235.80 | 13 | 55.04 | 20.45 | -0.94 | 1.36  | -0.51 | -0.90 | 33.33 | 0.00 |
| 366_Iran_Marjan_Mashkour_b                                        | 0.00 | 0.00 | 0.00 | 0.06 | 0.00 | 0.22 | 0.00 | 0.00 | 0.00 | 0.00 | 0.00 | 0.73 | 0.00 |      | 0.50 | 348.67 | 178.67 | 13 | 52.18 | 18.42 | -1.96 | 0.05  | -1.56 | -2.24 | 66.67 | 1.00 |
| 180ARQara_Quzaq2                                                  | 0.00 | 0.00 | 0.00 | 0.00 | 0.13 | 0.37 | 0.00 | 0.00 | 0.00 | 0.00 | 0.00 | 0.50 | 0.00 | N/A  | 0.50 | 400.00 | 294.00 | 7  | 73.50 | 21.25 | -2.11 | 0.38  | -1.88 | -2.37 | 50.00 | 1.00 |
| 334_Levant_Jennifer_Ramsay_tall_al_Umayri                         | 0.00 | 0.00 | 0.00 | 0.00 | 0.13 | 0.37 | 0.00 | 0.00 | 0.00 | 0.00 | 0.00 | 0.50 | 0.00 | N/A  | 0.50 | 440.00 | 303.00 | 7  | 68.86 | 14.68 | -1.77 | 0.41  | -0.91 | -0.66 | 50.00 | 1.00 |
| 368_Levant_Jennifer_Ramsay_tall_al_Umayri                         | 0.00 | 0.00 | 0.00 | 0.00 | 0.13 | 0.37 | 0.00 | 0.00 | 0.00 | 0.00 | 0.00 | 0.50 | 0.00 | N/A  | 0.50 | 440.00 | 303.00 | 7  | 68.86 | 16.23 | -1.60 | 0.71  | -0.76 | -0.66 | 50.00 | 1.00 |
| 372_Levant_Jennifer_Ramsay_Petra_Garden                           | 0.00 | 0.00 | 0.00 | 0.00 | 0.13 | 0.37 | 0.00 | 0.00 | 0.00 | 0.00 | 0.00 | 0.50 | 0.00 | N/A  | 0.50 | 424.00 | 299.00 | 7  | 70.52 | 25.26 | -0.78 | 2.26  | -0.08 | -0.93 | 50.00 | 1.00 |
| 3.1.3 Wild relatives                                              |      |      |      |      |      |      |      |      |      |      |      |      |      |      |      |        |        |    |       |       |       |       |       |       |       |      |
| 326_Central_Asia_Robert_Spengler_Tuzusai                          | 0.00 | 0.00 | 0.00 | 0.00 | 0.08 | 0.46 | 0.00 | 0.00 | 0.00 | 0.00 | 0.00 | 0.46 | 0.00 | N/A  | 0.33 | 387.00 | 298.00 | 7  | 77.00 | 22.48 | -1.43 | 1.29  | -0.75 | -1.58 | 66.67 | 1.00 |
| 359_Central_Asia_Robert_Spengler_Tuzusai                          | 0.00 | 0.00 | 0.00 | 0.00 | 0.08 | 0.46 | 0.00 | 0.00 | 0.00 | 0.00 | 0.00 | 0.46 | 0.00 | N/A  | 0.33 | 387.00 | 298.00 | 7  | 77.00 | 22.48 | -1.43 | 1.29  | -0.75 | -1.58 | 66.67 | 1.00 |
| 360_Euphrates_Area_Emel_Oybak_EBA_B                               | 0.00 | 0.00 | 0.00 | 0.00 | 0.08 | 0.46 | 0.00 | 0.00 | 0.00 | 0.00 | 0.00 | 0.46 | 0.00 | N/A  | 0.33 | 386.00 | 295.00 | 7  | 76.42 | 25.30 | -1.27 | 1.82  | -0.49 | -1.59 | 66.67 | 1.00 |
| 366_Iran_Marjan_Mashkour_b                                        | 0.00 | 0.00 | 0.00 | 0.00 | 0.00 | 0.29 | 0.00 | 0.00 | 0.00 | 0.00 | 0.00 | 0.71 | 0.00 | 0.19 | 0.28 | 348.67 | 178.67 | 13 | 52.18 | 18.42 | -1.96 | 0.05  | -1.56 | -2.24 | 66.67 | 1.00 |
| 332_Iran_Marjan_Mashkour                                          | 0.00 | 0.00 | 0.00 | 0.00 | 0.00 | 0.31 | 0.00 | 0.00 | 0.00 | 0.00 | 0.00 | 0.69 | 0.00 |      | 0.17 | 426.00 | 235.80 | 13 | 55.04 | 20.45 | -0.94 | 1.36  | -0.51 | -0.90 | 33.33 | 0.00 |
| 366_Iran_Marjan_Mashkour_b                                        | 0.00 | 0.00 | 0.00 | 0.00 | 0.00 | 0.31 | 0.00 | 0.00 | 0.00 | 0.00 | 0.00 | 0.69 | 0.00 |      | 0.17 | 348.67 | 178.67 | 13 | 52.18 | 18.42 | -1.96 | 0.05  | -1.56 | -2.24 | 66.67 | 1.00 |
| 476_53ky_Vitis_sp.                                                | 0.00 | 0.00 | 0.00 | 0.00 | 0.05 | 0.51 | 0.00 | 0.00 | 0.00 | 0.00 | 0.00 | 0.45 | 0.00 | N/A  | 0.17 | 421.00 | 300.00 | 7  | 71.26 | 13.09 | -2.16 | -0.37 | -1.58 | -1.29 | 83.33 | 1.00 |
| 478_45ky_Vitis_sp.                                                | 0.00 | 0.00 | 0.00 | 0.00 | 0.05 | 0.51 | 0.00 | 0.00 | 0.00 | 0.00 | 0.00 | 0.45 | 0.00 | N/A  | 0.17 | 400.00 | 300.00 | 7  | 75.00 | 11.69 | -2.24 | -0.79 | -1.85 | -1.54 | 83.33 | 1.00 |
| 3.1.4. European hybrid wild grapevines                            |      |      |      |      |      |      |      |      |      |      |      |      |      |      |      |        |        |    |       |       |       |       |       |       |       |      |
| 265_tell_jamis_as_100_1                                           | 0.00 | 0.00 | 0.00 | 0.00 | 0.19 | 0.81 | 0.00 | 0.00 | 0.00 | 0.00 | 0.00 | 0.00 | 0.00 | N/A  | 0.33 | 436.00 | 337.00 | 10 | 77.29 | 21.22 | -1.63 | 0.81  | -1.28 | -1.72 | 66.67 | 1.00 |
| 337_Levant_Jacquat_Petra1                                         | 0.00 | 0.00 | 0.00 | 0.00 | 0.52 | 0.48 | 0.00 | 0.00 | 0.00 | 0.00 | 0.00 | 0.00 | 0.00 |      | 0.33 | 499.00 | 393.71 | 3  | 78.95 | 20.37 | -0.99 | 1.60  | -0.28 | -0.36 | 50.00 | 1.00 |
| 337_Levant_Jacquat_Petra1                                         | 0.00 | 0.00 | 0.00 | 0.00 | 0.36 | 0.64 | 0.00 | 0.00 | 0.00 | 0.00 | 0.00 | 0.00 | 0.00 |      | 0.17 | 499.00 | 393.71 | 3  | 78.95 | 20.37 | -0.99 | 1.60  | -0.28 | -0.36 | 50.00 | 1.00 |
| 371_Levant_Jacquat                                                | 0.00 | 0.00 | 0.00 | 0.00 | 0.52 | 0.48 | 0.00 | 0.00 | 0.00 | 0.00 | 0.00 | 0.00 | 0.00 |      | 0.33 | 529.60 | 391.90 | 3  | 74.65 | 19.97 | -0.74 | 2.07  | 0.19  | 0.39  | 16.67 | 0.00 |
| 371_Levant_Jacquat                                                | 0.00 | 0.00 | 0.00 | 0.00 | 0.36 | 0.64 | 0.00 | 0.00 | 0.00 | 0.00 | 0.00 | 0.00 | 0.00 |      | 0.17 | 529.60 | 391.90 | 3  | 74.65 | 19.97 | -0.74 | 2.07  | 0.19  | 0.39  | 16.67 | 0.00 |
| 373_Levant_Simone_Riehl                                           | 0.00 | 0.00 | 0.00 | 0.00 | 0.52 | 0.48 | 0.00 | 0.00 | 0.00 | 0.00 | 0.00 | 0.00 | 0.00 |      | 0.33 | 503.00 | 348.50 | 3  | 70.25 | 25.06 | 0.01  | 2.80  | 0.40  | 0.00  | 0.00  | 0.00 |
| 337_Levant_Jacquat_Petra1                                         | 0.00 | 0.00 | 0.00 | 0.00 | 0.64 | 0.30 | 0.06 | 0.00 | 0.00 | 0.00 | 0.00 | 0.00 | 0.00 | 0.27 | 0.50 | 499.00 | 393.7  |    |       |       |       |       |       |       |       |      |

|                                                                                              |      |      |      |      |      |      |      |      |      |      |      |      |      |      |      |      |        |        |        |       |       |       |       |       |       |        |       |      |
|----------------------------------------------------------------------------------------------|------|------|------|------|------|------|------|------|------|------|------|------|------|------|------|------|--------|--------|--------|-------|-------|-------|-------|-------|-------|--------|-------|------|
| 333_Iran_Alexia_Decaix                                                                       | 0.00 | 0.00 | 0.00 | 0.00 | 0.00 | 0.00 | 0.00 | 0.00 | 0.00 | 0.00 | 0.00 | 0.00 | 0.99 | 0.01 |      | 0.00 | 360.00 | 313.00 | 12     | 86.91 | 19.43 | -2.87 | -0.45 | -2.92 | -3.10 | 83.33  | 1.00  |      |
| 367_Iran_Alexia_Decaix                                                                       | 0.00 | 0.00 | 0.00 | 0.00 | 0.00 | 0.00 | 0.00 | 0.00 | 0.00 | 0.00 | 0.00 | 0.00 | 0.99 | 0.01 |      | 0.00 | 360.00 | 313.00 | 12     | 86.91 | 21.47 | -2.80 | -0.06 | -2.73 | -3.10 | 66.67  | 1.00  |      |
| 333_Iran_Alexia_Decaix                                                                       | 0.00 | 0.00 | 0.00 | 0.00 | 0.00 | 0.00 | 0.00 | 0.00 | 0.00 | 0.00 | 0.00 | 0.00 | 0.98 | 0.02 | 0.24 | 0.17 | 360.00 | 313.00 | 12     | 86.91 | 19.43 | -2.87 | -0.45 | -2.92 | -3.10 | 83.33  | 1.00  |      |
| 367_Iran_Alexia_Decaix                                                                       | 0.00 | 0.00 | 0.00 | 0.00 | 0.00 | 0.00 | 0.00 | 0.00 | 0.00 | 0.00 | 0.00 | 0.00 | 0.98 | 0.02 | 0.24 | 0.17 | 360.00 | 313.00 | 12     | 86.91 | 21.47 | -2.80 | -0.06 | -2.73 | -3.10 | 66.67  | 1.00  |      |
| 333_Iran_Alexia_Decaix                                                                       | 0.00 | 0.00 | 0.00 | 0.00 | 0.00 | 0.00 | 0.00 | 0.00 | 0.00 | 0.00 | 0.00 | 0.00 | 0.99 | 0.01 |      | 0.33 | 360.00 | 313.00 | 12     | 86.91 | 19.43 | -2.87 | -0.45 | -2.92 | -3.10 | 83.33  | 1.00  |      |
| 367_Iran_Alexia_Decaix                                                                       | 0.00 | 0.00 | 0.00 | 0.00 | 0.00 | 0.00 | 0.00 | 0.00 | 0.00 | 0.00 | 0.00 | 0.00 | 0.99 | 0.01 |      | 0.33 | 360.00 | 313.00 | 12     | 86.91 | 21.47 | -2.80 | -0.06 | -2.73 | -3.10 | 66.67  | 1.00  |      |
| 242V_orientalisClemente                                                                      | 0.00 | 0.00 | 0.00 | 0.00 | 0.00 | 0.00 | 0.00 | 0.00 | 0.00 | 0.00 | 0.00 | 0.00 | 0.99 | 0.00 |      | 0.17 | 400.00 | 353.67 | 11     | 88.49 | 14.39 | -2.24 | -0.51 | -1.94 | -1.84 | 100.00 | 1.00  |      |
| 722Van_Zeist_Deir_Alla_Jordan                                                                | 0.00 | 0.00 | 0.00 | 0.00 | 0.00 | 0.00 | 0.00 | 0.00 | 0.00 | 0.00 | 0.00 | 0.00 | 0.01 | 0.99 | 0.00 | N/A  | 0.50   | 436.00 | 325.00 | 11    | 74.54 | 21.22 | -1.19 | 1.45  | -0.53 | -0.93  | 50.00 | 1.00 |
| 406_S518_DVIT_1445_V_afghanistan                                                             | 0.00 | 0.00 | 0.00 | 0.00 | 0.00 | 0.00 | 0.00 | 0.00 | 0.00 | 0.00 | 0.00 | 0.00 | 0.01 | 0.99 | 0.00 |      | 0.50   | 441.60 | 355.90 | 11    | 80.72 | 12.22 | -2.06 | -0.09 | -1.19 | -0.69  | 66.67 | 1.00 |
| 406_S518_DVIT_1445_V_afghanistan                                                             | 0.00 | 0.00 | 0.00 | 0.00 | 0.00 | 0.00 | 0.00 | 0.00 | 0.00 | 0.00 | 0.00 | 0.00 | 0.01 | 0.99 | 0.00 |      | 0.33   | 441.60 | 355.90 | 11    | 80.72 | 12.22 | -2.06 | -0.09 | -1.19 | -0.69  | 66.67 | 1.00 |
| 406_S518_DVIT_1445_V_afghanistan                                                             | 0.00 | 0.00 | 0.00 | 0.00 | 0.00 | 0.00 | 0.00 | 0.00 | 0.00 | 0.00 | 0.00 | 0.00 | 0.01 | 0.99 | 0.00 | 0.16 | 0.23   | 441.60 | 355.90 | 11    | 80.72 | 12.22 | -2.06 | -0.09 | -1.19 | -0.69  | 66.67 | 1.00 |
| 406_S518_DVIT_1445_V_afghanistan                                                             | 0.00 | 0.00 | 0.00 | 0.00 | 0.00 | 0.00 | 0.00 | 0.00 | 0.00 | 0.00 | 0.00 | 0.00 | 0.00 | 0.99 | 0.00 |      | 0.17   | 441.60 | 355.90 | 11    | 80.72 | 12.22 | -2.06 | -0.09 | -1.19 | -0.69  | 66.67 | 1.00 |
| 429_S5228_DVIT_2346.1_A_vitifolia                                                            | 0.00 | 0.00 | 0.00 | 0.00 | 0.00 | 0.00 | 0.00 | 0.00 | 0.00 | 0.00 | 0.00 | 0.00 | 0.99 | 0.00 |      | 0.17 | 436.00 | 379.30 | 11     | 87.14 | 11.09 | -2.95 | -1.39 | -2.58 | -2.03 | 100.00 | 1.00  |      |
| 267_tell_jamis_as_108_1                                                                      | 0.00 | 0.00 | 0.00 | 0.00 | 0.00 | 0.00 | 0.00 | 0.00 | 0.00 | 0.00 | 0.00 | 0.00 | 0.99 | 0.01 | N/A  | 0.00 | 365.00 | 312.00 | 12     | 85.48 | 12.19 | -2.13 | -0.99 | -2.04 | -2.00 | 100.00 | 1.00  |      |
| 330_Ganges_Area_Anil_Pokharia_Neolithic_Early                                                | 0.00 | 0.00 | 0.00 | 0.00 | 0.00 | 0.00 | 0.00 | 0.00 | 0.00 | 0.00 | 0.00 | 0.00 | 0.99 | 0.01 | N/A  | 0.00 | 373.00 | 292.00 | 12     | 78.28 | 9.17  | -2.23 | -1.44 | -2.18 | -1.82 | 100.00 | 1.00  |      |
| 363_Ganges_Area_Anil_Pokharia_Neolithic_Early                                                | 0.00 | 0.00 | 0.00 | 0.00 | 0.00 | 0.00 | 0.00 | 0.00 | 0.00 | 0.00 | 0.00 | 0.00 | 0.99 | 0.01 | N/A  | 0.00 | 373.00 | 292.00 | 12     | 78.28 | 10.13 | -2.18 | -1.26 | -2.09 | -1.82 | 100.00 | 1.00  |      |
| 566_Tell_Jamis_040_2017                                                                      | 0.00 | 0.00 | 0.00 | 0.00 | 0.00 | 0.00 | 0.00 | 0.00 | 0.00 | 0.00 | 0.00 | 0.00 | 0.99 | 0.01 | N/A  | 0.33 | 356.00 | 278.00 | 12     | 78.09 | 24.44 | -1.37 | 1.54  | -0.44 | -1.81 | 66.67  | 1.00  |      |
| 339_Levant_Yoel_Melamed_Gesher                                                               | 0.00 | 0.00 | 0.00 | 0.00 | 0.00 | 0.00 | 0.00 | 0.00 | 0.00 | 0.00 | 0.00 | 0.00 | 0.99 | 0.01 | N/A  | 0.33 | 345.00 | 257.00 | 12     | 74.49 | 17.35 | -1.98 | -0.20 | -1.71 | -2.30 | 66.67  | 1.00  |      |
| 375_Levant_Yoel_Melamed_Gesher                                                               | 0.00 | 0.00 | 0.00 | 0.00 | 0.00 | 0.00 | 0.00 | 0.00 | 0.00 | 0.00 | 0.00 | 0.00 | 0.99 | 0.01 | N/A  | 0.50 | 345.00 | 257.00 | 12     | 74.49 | 19.17 | -1.93 | 0.16  | -1.53 | -2.30 | 50.00  | 1.00  |      |
| 185ARQuara_Quzaq2                                                                            | 0.00 | 0.00 | 0.00 | 0.00 | 0.00 | 0.00 | 0.00 | 0.00 | 0.00 | 0.00 | 0.00 | 0.00 | 0.01 | 0.99 | 0.00 | N/A  | 0.33   | 489.00 | 428.00 | 11    | 87.53 | 17.59 | -1.51 | 0.92  | -0.70 | -0.57  | 66.67 | 1.00 |
| 3.1.8. Raisin type seeds with low domestication syndrome remotely linked to genus Ampelopsis |      |      |      |      |      |      |      |      |      |      |      |      |      |      |      |      |        |        |        |       |       |       |       |       |       |        |       |      |
| 335_Levant_Chantel                                                                           | 0.00 | 0.00 | 0.00 | 0.00 | 0.00 | 0.00 | 0.00 | 0.00 | 0.00 | 0.00 | 0.00 | 0.00 | 0.99 | 0.01 | 0.00 | 0.50 | 335.33 | 146.33 | 12     | 43.66 | 32.97 | -1.81 | 2.70  | -0.32 | -2.47 | 50.00  | 1.00  |      |
| 369_Levant_Chantel                                                                           | 0.00 | 0.00 | 0.00 | 0.00 | 0.00 | 0.00 | 0.00 | 0.00 | 0.00 | 0.00 | 0.00 | 0.00 | 0.99 | 0.01 |      | 0.50 | 335.33 | 146.33 | 12     | 43.66 | 36.44 | -1.77 | 3.37  | 0.01  | -2.47 | 33.33  | 1.00  |      |
| 369_Levant_Chantel                                                                           | 0.00 | 0.00 | 0.00 | 0.00 | 0.00 | 0.00 | 0.00 | 0.00 | 0.00 | 0.00 | 0.00 | 0.00 | 0.99 | 0.01 | 0.10 | 0.56 | 335.33 | 146.33 | 12     | 43.66 | 36.44 | -1.77 | 3.37  | 0.01  | -2.47 | 33.33  | 1.00  |      |
| 369_Levant_Chantel                                                                           | 0.00 | 0.00 | 0.00 | 0.00 | 0.00 | 0.00 | 0.00 | 0.00 | 0.00 | 0.00 | 0.00 | 0.00 | 1.00 | 0.00 |      | 0.67 | 335.33 | 146.33 | 12     | 43.66 | 36.44 | -1.77 | 3.37  | 0.01  | -2.47 | 33.33  | 1.00  |      |
| 564_Tell_Jamis_038_2017                                                                      | 0.00 | 0.00 | 0.00 | 0.00 | 0.00 | 0.00 | 0.00 | 0.00 | 0.00 | 0.00 | 0.00 | 0.00 | 0.99 | 0.01 | N/A  | 0.50 | 225.00 | 141.00 | 12     | 62.67 | 31.56 | -3.72 | 1.01  | -1.47 | -4.50 | 50.00  | 1.00  |      |
| 561_Tell_Jamis_064_2017                                                                      | 0.00 | 0.00 | 0.00 | 0.00 | 0.00 | 0.00 | 0.00 | 0.00 | 0.00 | 0.00 | 0.00 | 0.00 | 0.99 | 0.01 | 0.00 | 0.50 | 255.67 | 139.00 | 12     | 54.63 | 32.02 | -3.05 | 1.51  | -0.94 | -3.91 | 50.00  | 1.00  |      |
| 563_Tell_Jamis_059_2017                                                                      | 0.00 | 0.00 | 0.00 | 0.00 | 0.00 | 0.00 | 0.00 | 0.00 | 0.00 | 0.00 | 0.00 | 0.00 | 0.99 | 0.01 | N/A  | 0.50 | 240.00 | 108.00 | 12     | 45.00 | 37.71 | -3.77 | 2.34  | -0.55 | -4.27 | 50.00  | 1.00  |      |
